# Supplementary material for: PSMA3-AS1 induced by transcription factor PAX5 promotes cholangiocarcinoma proliferation, migration and invasion by sponging miR-376a-3p to up-regulate LAMC1
Source: Aging (Albany NY). 2022 Jan 12;14(1):509–25. doi: 10.18632/aging.203828 (PMC8791211; doi:10.18632/aging.203828)
Supplement: Supplementary Figure 1 [file aging-14-203828-s001.pdf]

## SUPPLEMENTARY FIGURE

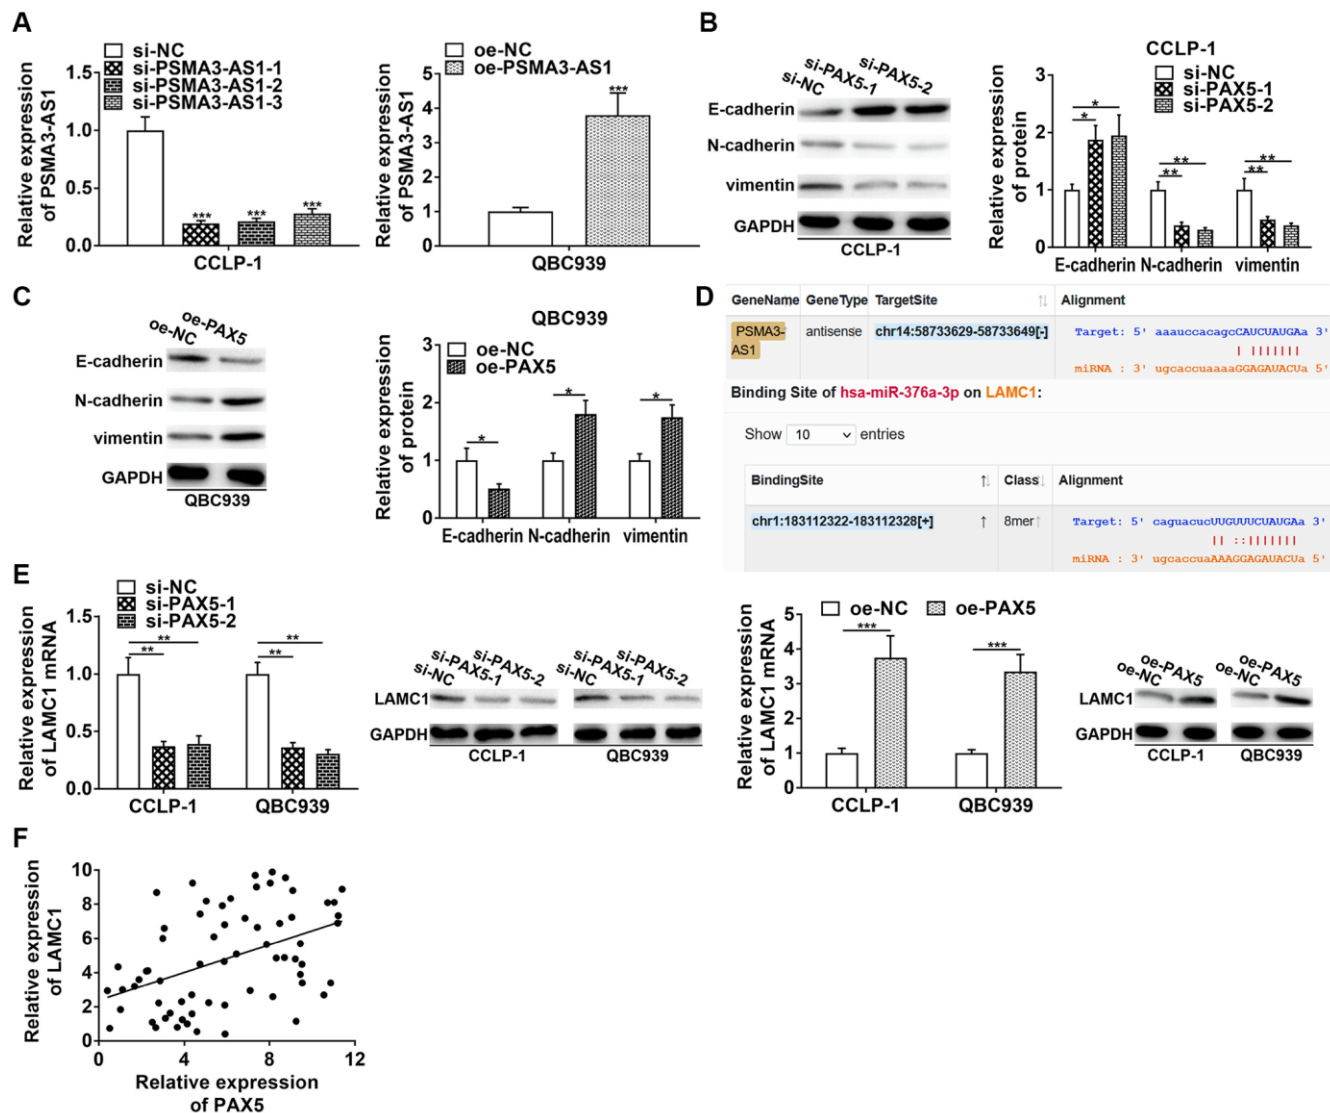

**Supplementary Figure 1. PAX5 promotes EMT process and LAMC1 expression in CCA.** (A) Knockdown efficiency and amplification efficiency of PSMA3-AS1. (B) Silencing PAX5 inhibited the EMT process in CCLP-1 cells, and (C) overexpressing PAX5 promoted EMT process in QBC939 cells. (D) StarBase v3.0 database showed that PSMA3-AS1 had overlapping binding sites with LAMC1 at miR-376a-3p sequences. (E) PAX5 promoted LAMC1 expression both at mRNA and protein level in CCA. (F) PAX5 expression was positively related to LAMC1 expression in CCA. \* $P < 0.05$ , \*\* $P < 0.01$ , \*\*\* $P < 0.001$ .
