# Supplementary material for: PSMA3-AS1 induced by transcription factor PAX5 promotes cholangiocarcinoma proliferation, migration and invasion by sponging miR-376a-3p to up-regulate LAMC1
Source: publisher site journal article supplement (doi:10.18632/aging.203828), 2022-01-12
Supplement: Supplementary file [file aging-v14i1-203828-supplementary-material-SD2.pdf]

## SUPPLEMENTARY TABLE

**Supplementary Table 1. Primers and siRNAs used in this study.**

| Names                             | Sequences (5' to 3')                                                               |
|-----------------------------------|------------------------------------------------------------------------------------|
| PSMA3-AS1                         | F: 5'-AACAGACCATCAGAAGAGAACA-3'<br>R: 5'-GAACAGAAACCAGAGCCATACA-3'                 |
| LAMC1                             | F: 5'-ACTCCTAATCTTGGACCATAC-3'<br>R: 5'-ACAACAGCACAACTTGAAC-3'                     |
| PAX5                              | F: 5'-ACTTGCTCATCAAGGTGTCAG-3'<br>R: 5'-TCCTCCAATTACCCCAGGCTT-3'                   |
| GAPDH                             | F: 5'-GACAGTCAGCCGCATCTTCT-3'<br>R: 5'-TTAAAAGCAGCCCTGGTGAC-3'                     |
| U6                                | F: 5'-CTCGCTTCGGCAGCACA-3'<br>R: 5'-AACGCTTCACGAATTTGCGT-3'                        |
| miR-376a-3p                       | F: 5'-TGCACCTAAAAGGAG-3'<br>R: 5'-GTGCAGGGTCCGAGGT-3'                              |
| miR-107                           | F: 5'-GCCGAATTCAAAGCGAGATTCCATCAGCA-3'<br>R: 5'-GCCGGATCCTGTCAACCCAGAACT-CAAAGG-3' |
| miR-135-5p                        | F: 5'-AGCATAATACAGCAGGCACAGAC-3'<br>R: 5'-AAAGGTTGTTCTCCACTCTCTCAC-3'              |
| miR-205-5p                        | F: 5'-TCCTTCATTCCACCGGAGTCTG-3'<br>R: 5'-GCGAGCACAGAATTAATACGAC-3'                 |
| miR-218-5p                        | F: 5'-TTGCGGATGGTTCCGTCAAGCA-3'<br>R: 5'-ATCCAGTGCAGGGTCCGAGG-3'                   |
| miR-448                           | F: 5'-TTATTGCGATGTGTTTCCTTATG-3'<br>R: 5'-ATGCATGCCACGGGCATATACACT-3'              |
| miR-9-5p                          | F: 5'-GTGCAGGGTCCGAGGT-3'<br>R: 5'-GCGCTCTTTGGTTATCTAGC-3'                         |
| PSMA3-AS1 promoter binding site 1 | F: 5'-GGTAGCGAGGTCCTATCCGA-3'<br>R: 5'-GTATCCCCGGATTCCCCTCT-3'                     |
| PSMA3-AS1 promoter binding site 2 | F: 5'-GGGAGAGGGATGCTAGGCAA-3'<br>R: 5'-CGCCCCGCTCAACTTTTTG-3'                      |
| si-PSMA3-AS1-1                    | 5'-CCAGCAUCAAGAUGAUUUA-3'                                                          |
| si-PSMA3-AS1-2                    | 5'-UCUCGAAAACCCGAAAGAGAA-3'                                                        |
| si-PSMA3-AS1-3                    | 5'-GGCCUAAGAAUCUCUUGAA-3'                                                          |
| si-PAX5-1                         | 5'-GCAGUCUGUUCUGAACAU-3'                                                           |
| si-PAX5-2                         | 5'-CAAAGGAUAGUGGAACUUG-3'                                                          |
| si-LAMC1                          | 5'-UCAUCAAUUCUGAAAGGUAGAG-3'                                                       |
